# Supplementary material
Source: Springer Nature journal article supplement (https://www.springermedizin.de/resource/supplementary/12974_2005_53_MOESM2_ESM.pdf/9600674)

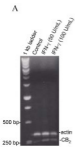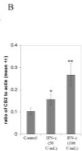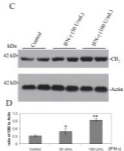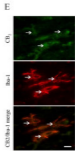

Supplement: MOESM2 [file 9600674]
